# Supplementary material for: Ultrasensitive diffraction gratings based on smart hydrogels for highly selective and rapid detection of trace heavy metal ions
Source: Royal Society of Chemistry journal article supplement (doi:10.1039/c8tc02347f), 2018-01-01
Supplement: c8tc02347f1.pdf [file c8tc02347f1.pdf]

Supplementary Material (ESI) for Journal of Materials Chemistry C  
This journal is © The Royal Society of Chemistry 2018

## Ultrasensitive diffraction gratings based on smart hydrogel for high-selective and rapid detection of trace heavy metal ions

Han-Yu Peng,<sup>a</sup> Wei Wang,<sup>\*ab</sup> Fuhua Gao,<sup>c</sup> Shuo Lin,<sup>a</sup> Lu-Yue Liu,<sup>a</sup> Xing-Qun Pu,<sup>a</sup> Zhuang Liu,<sup>ab</sup> Xiao-Jie Ju,<sup>ab</sup> Rui Xie,<sup>ab</sup> and Liang-Yin Chu<sup>\*ab</sup>

<sup>a</sup> School of Chemical Engineering, Sichuan University, Chengdu, Sichuan, 610065, China

E-mail: chuly@scu.edu.cn (L.-Y. Chu), wangwei512@scu.edu.cn (W. Wang)

<sup>b</sup> State Key Laboratory of Polymer Materials Engineering, Sichuan University, Chengdu, Sichuan, 610065, China

<sup>c</sup> College of Physical Science and Technology, Sichuan University, Chengdu, Sichuan 610065, China

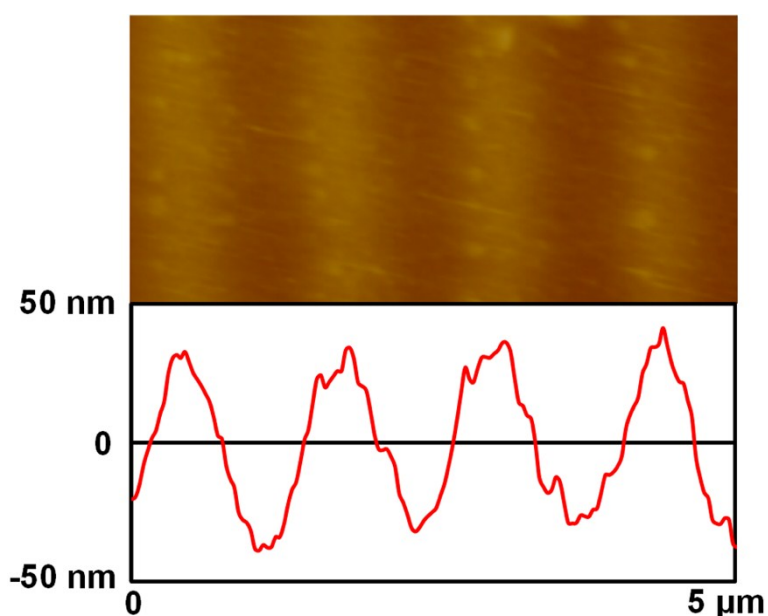

Fig. S1. AFM image and section analysis of the PNB hydrogel grating at 40 °C in pure water.
